# Supplementary material for: Genome-Wide Bovine H3K27me3 Modifications and the Regulatory Effects on Genes Expressions in Peripheral Blood Lymphocytes
Source: PLoS One. 2012 Jun 28;7(6):e39094. doi: 10.1371/journal.pone.0039094 (PMC3386284; doi:10.1371/journal.pone.0039094)
Supplement: Table S3 — Supporting file for Figure6A-Cytokines genes cluster. (XLSX) [file pone.0039094.s011.xlsx]

## Sheet: B105213(138).txt
Gene_name	DGE_C1	DGE_C2	DGE_C3	DGE_C4	H3K27ME3_C1	H3K27ME3_C2	H3K27ME3_C3	H3K27ME3_C4
ADIPOR1	0.57	2.69	1.17	0.86	0	0	0	0
AFAP1L2	1.43	6.57	2.64	3.73	0	0	0	0
AGPAT2	17.97	16.13	13.77	26.98	0	0	0	0
BCL10	138.65	210.95	166.71	148.1	0	0	0	0
C16orf5	0	0.6	0	0	0	0	0	0
C3AR1	3.14	2.99	6.45	1.44	0	0	0	0
CD14	9.99	27.19	82.92	20.66	0	0	0	0
CD1A	52.21	120.41	188.69	62.86	0	0	0	0
CD1E	5.14	6.27	5.27	3.73	0	0	0	0
CD2	37.37	38.55	38.09	24.68	0	0	0	0
CD200	0	0	0	0	0	0	0	0
CD27	65.33	35.56	46.88	38.17	0	0	0	0
CD2BP2	19.11	20.32	22.27	16.07	0	0	0	0
CD320	9.41	11.35	10.25	13.49	0	0	0	0
CD3D	11.98	14.94	14.94	13.49	0	0	0	0
CD4	59.34	112.05	53.03	49.65	0	0	0	0
CD46	121.25	114.14	125.99	137.77	0	0	0	0
CD55	1.43	2.39	0	0.57	0	0	0	0
CD5L	1.43	0	0	0	0	0	0	0
CD79A	63.62	193.02	70.9	75.2	0	0	0	0
CD80	0	1.49	0	0	0	0	0	0
CD83	513.25	632.54	726.33	1180.48	0	0	0	0
CD99L2	6.56	8.37	16.11	6.31	0	0	0	0
CETN2	14.55	25.1	14.06	11.48	0	0	0	0
COMMD7	39.66	74.1	31.94	53.67	0	0	0	0
CSNK2B	21.97	49.6	21.39	17.51	0	0	0	0
DAXX	0	0.6	0	0	0	0	0	0
ELF1	208.55	135.05	175.79	138.05	0	0	0	0
G6PD	0	9.56	1.76	2.01	0	0	0	0
GAB1	12.55	12.25	4.98	7.75	0	0	0	0
GPAM	3.42	0.9	2.93	1.72	0	0	0	0
IFNAR	0	0	0	0	0	0	0	0
IGBP1(GeneID:534155)	75.89	43.02	48.34	63.43	0	0	0	0
IL10	2	1.49	0	2.58	0	0	0	0
IL10RB	10.56	9.86	22.26	4.59	0	0	0	0
IL-12R beta2	1.14	2.09	0	1.15	0	0	0	0
IL17RB	1.14	1.79	0.59	1.44	0	0	0	0
IL17RC	0	0.6	0	0	0	0	0	0
IL-1-alpha	185.73	13.74	203.04	36.16	0	0	0	0
IL-1-beta	71.61	20.92	177.26	64.29	0	0	0	0
IL1RAP	4.85	4.18	2.34	11.19	0	0	0	0
IL20RA	0.86	0	0.59	0.57	0	0	0	0
IL20RB	5.14	2.99	1.46	1.44	0	0	0	0
IL-23	0.57	0.9	0.59	0.86	0	0	0	0
IL27RA	87.02	104.88	71.78	89.26	0	0	0	0
IL34	0	0	0	0	0	0	0	0
IL7	7.7	13.45	2.93	7.18	0	0	0	0
ILDR1	0	0	1.46	0.86	0	0	0	0
IRAK2	170.04	24.8	183.12	93.57	0	0	0	0
IRF1	726.08	374.69	647.8	483.9	0	0	0	0
MGC154956	10.84	37.95	14.94	31	0	0	0	0
N-PAC	86.16	69.02	60.36	56.54	0	0	0	0
PELI1	139.23	89.34	134.78	119.4	0	0	0	0
PRG3(GeneID:783660)	0	0	0	0	0	0	0	0
PRKCD	29.39	59.76	32.23	38.46	0	0	0	0
PYCARD	81.6	134.76	227.07	87.25	0	0	0	0
RELA	211.69	138.64	171.99	136.9	0	0	0	0
RIPK1	37.37	29.28	17.58	52.81	0	0	0	0
RIPK2	81.02	30.78	36.92	126	0	0	0	0
SCAMP5	0	0.6	0	0	0	0	0	0
SIGIRR	96.72	65.44	62.41	73.47	0	0	0	0
SOCS5	5.14	2.69	2.34	6.89	0	0	0	0
SRGN	1374	1306.62	2325.18	1399.46	0	0	0	0
SYK	26.53	30.78	25.2	26.98	0	0	0	0
TICAM2	7.42	4.78	8.2	9.18	0	0	0	0
TNF	274.17	8.07	234.39	30.71	0	0	0	0
TRADD	14.26	19.72	22.56	16.36	0	0	0	0
TXNDC17	6.85	30.48	19.04	14.06	0	0	0	0
AKIRIN2	124.68	79.78	76.76	207.22	1	0	2	2
ANXA11	0	2.09	0.59	0.86	0	2	3	1
BPI	0	1.79	0	0	4	2	3	4
C3	20.54	21.21	23.15	12.34	5	11	9	4
C5AR1	0.86	5.08	3.81	2.87	4	3	9	8
CASP8	2.57	3.59	2.05	4.02	2	0	2	2
CD163	35.66	35.56	56.25	26.4	5	13	6	6
CD164	7.42	8.07	6.15	5.74	0	0	0	0
CD164L2	0	0	1.17	1.15	8	6	8	5
CD177	0	0	0	0	7	4	3	4
CD18	127.24	353.47	195.72	171.35	1	0	0	3
CD1D	3.99	5.38	2.64	7.18	2	3	5	4
CD200R1L	15.41	20.92	20.8	15.79	2	2	2	5
CD247	1.14	0	1.17	1.44	6	3	3	1
CD2AP	193.72	138.04	216.23	119.68	0	1	0	2
CD300LB	3.99	7.17	5.57	5.17	3	4	4	4
CD300LG	0.57	0	1.46	0	12	10	15	10
CD302	13.69	26.29	16.7	19.52	4	3	1	6
CD34	0	1.2	0	0	17	15	11	12
CD37	61.62	224.09	78.81	126.57	1	0	0	2
CD38	22.25	40.04	29.01	13.78	8	5	9	8
CD3EAP	0.86	3.59	1.46	5.45	3	0	1	0
CD3G	59.63	83.06	80.87	50.51	9	6	1	2
CD40	146.36	109.96	118.08	164.17	13	3	6	5
CD40LG	0	0.9	0	0	2	3	1	8
CD47	78.17	86.95	72.08	120.54	1	0	0	1
CD58	18.54	16.73	11.72	12.05	0	4	0	0
CD6	1.43	2.99	1.76	1.15	1	0	2	1
CD68	0.57	2.39	0.59	1.72	0	0	0	0
CD7	10.56	10.16	8.5	10.33	0	0	2	1
CD82	15.98	46.61	12.01	37.89	2	1	2	1
CD8B	5.42	17.93	19.63	18.08	6	10	7	7
CD96	10.27	28.09	8.79	27.27	9	4	5	8
CD97	0	0.6	0	0	0	1	0	0
CIP29	63.91	33.17	43.66	91.27	0	0	0	3
CISH	0.57	2.09	0.59	4.59	2	3	2	0
CLEC7A	0	1.2	0	0.86	11	7	10	5
CRTAM	7.7	12.25	12.89	12.92	12	8	11	7
CXCL16	39.09	22.11	47.46	29.28	2	0	2	3
IL11RA	0.86	0.6	0	0	15	23	23	13
IL13RA1	3.99	32.57	9.08	9.47	7	11	8	5
IL16	31.95	51.99	31.94	47.64	6	5	4	3
IL1R2	0	0	1.17	0.57	10	12	14	9
IL2RG	212.83	266.52	191.32	245.68	2	2	2	2
IL4R	43.37	21.51	24.03	53.38	4	4	1	4
IL8	1.14	0	0	2.58	5	4	10	4
ILDR2	0	1.49	0	0.57	6	17	12	10
ILF2	27.39	58.56	25.49	43.91	1	3	2	1
IRF-1	726.08	374.69	647.8	483.9	0	0	0	0
IRF8	152.92	111.15	138.29	179.67	3	2	7	3
MAP2K3	28.24	44.22	24.03	84.96	1	1	0	1
MIF	68.76	104.58	73.25	45.35	2	0	1	3
NKG2D	10.27	4.48	4.1	9.76	8	8	6	2
NLRP3	23.68	7.17	42.78	12.05	9	8	4	10
NUSAP1	7.13	7.47	8.5	7.46	0	0	1	1
PRC1	8.84	0.9	5.57	2.01	3	1	1	0
SASH3	209.69	224.39	314.38	201.48	1	0	0	2
SELS	113.83	75	60.94	135.76	5	4	6	1
SOCS2	0	0	0	0	13	7	5	3
SOCS3	0	2.39	0	0.86	2	1	0	0
SOCS4	7.42	5.98	7.32	8.04	0	0	0	1
SPAST	19.11	22.71	17.58	20.38	2	3	2	4
TAF9	45.65	32.57	49.52	36.45	0	0	0	0
THBS1	302.13	71.71	320.24	321.17	7	5	6	2
TLR4	19.11	17.93	31.35	29.85	4	2	3	5
TLR7	1.14	2.69	0.59	0.57	4	0	5	3
TLR9	2.57	2.09	2.34	2.01	0	0	0	0
TUBB3,TUBB6	12.27	11.66	23.44	7.75	3	2	6	2
UBD	442.78	790.31	739.8	598.7	0	0	0	0
Ugl	0	0	1.76	0	3	3	2	1
