# Supplementary material for: Genome-Wide Bovine H3K27me3 Modifications and the Regulatory Effects on Genes Expressions in Peripheral Blood Lymphocytes
Source: PLoS One. 2012 Jun 28;7(6):e39094. doi: 10.1371/journal.pone.0039094 (PMC3386284; doi:10.1371/journal.pone.0039094)
Supplement: Table S4 — Supporting file for Figure6B-Transcription factors genes cluster. (XLSX) [file pone.0039094.s012.xlsx]

## Sheet: B105213(178).txt
Gene_name	DGE_C1	DGE_C2	DGE_C3	DGE_C4	H3K27ME3_C1	H3K27ME3_C2	H3K27ME3_C3	H3K27ME3_C4
ABT1	5.99	14.64	5.86	5.45	0	0	0	0
AEBP1	5.14	1.49	6.74	6.6	0	0	0	0
ATF1	20.54	30.78	16.99	29.56	0	0	0	0
ATF3	211.41	135.35	287.42	85.82	0	0	0	0
ATF6	2	1.49	1.46	0.86	0	0	0	0
ATF7IP	20.83	29.88	24.03	12.05	0	0	0	0
CCDC59	22.54	18.82	36.62	20.66	0	0	0	0
CCNH	9.13	7.47	16.99	6.03	0	0	0	0
CDCA7L	10.56	10.46	13.77	12.34	0	0	0	0
CEBPA	85.87	49	52.74	69.74	0	0	0	0
CNOT2	40.51	49.9	40.43	53.96	0	0	0	0
COMMD7	39.66	74.1	31.94	53.67	0	0	0	0
CRSP6	5.99	7.47	6.15	7.75	0	0	0	0
CRSP9	3.42	4.18	2.05	1.72	0	0	0	0
DDX5	4751.93	2946.69	3903.23	3793.71	0	0	0	0
ELF1	208.55	135.05	175.79	138.05	0	0	0	0
ELF3	1.71	0.6	0	1.15	0	0	0	0
ELK4	5.14	2.39	1.76	10.05	0	0	0	0
FOXO4	10.56	9.26	7.62	16.65	0	0	0	0
FOXS1	17.4	6.27	4.98	8.04	0	0	0	0
GATA3	5.42	9.86	1.17	10.33	0	0	0	0
GTF2E2	54.49	37.95	45.41	45.63	0	0	0	0
GTF2H1	100.14	51.39	53.03	80.65	0	0	0	0
GTF2H2	5.14	6.57	11.72	8.32	0	0	0	0
GTF2H3	0.86	2.99	0.88	0.86	0	0	0	0
GTF2H4	3.71	5.08	3.81	1.72	0	0	0	0
GTF2I	11.98	15.24	12.31	5.45	0	0	0	0
HES1	78.46	65.44	76.47	99.59	0	0	0	0
HES6	0.57	0	1.46	0.86	0	0	0	0
HSF1	55.63	40.64	70.02	48.5	0	0	0	0
HSFY2	6.85	10.16	11.72	3.16	0	0	0	0
IRAK2	170.04	24.8	183.12	93.57	0	0	0	0
IRF3	0	0	0.59	0	0	0	0	0
JUNB	860.46	518.7	631.1	929.92	0	0	0	0
LMO4	34.81	69.32	45.41	35.3	0	0	0	0
LOC515894	3.99	0.9	1.17	1.72	0	0	0	0
MAF	12.55	34.96	12.6	18.66	0	0	0	0
MBTPS2	4.28	2.09	4.39	2.58	0	0	0	0
MED10	41.94	37.35	41.02	57.69	0	0	0	0
MED18	2	2.09	2.64	1.72	0	0	0	0
MED19	17.69	17.03	17.87	20.38	0	0	0	0
MED20	0.57	2.99	0.88	1.15	0	0	0	0
MED22	0	0.9	0.88	0	0	0	0	0
MED24	24.54	19.12	36.62	12.05	0	0	0	0
MED30	13.98	18.23	16.41	32.43	0	0	0	0
MED4	55.92	44.52	47.76	35.88	0	0	0	0
MED6	44.79	11.95	34.28	37.31	0	0	0	0
MGC139150	58.77	51.39	24.61	56.83	0	0	0	0
MITF	0.57	5.68	2.64	2.58	0	0	0	0
MTDH	148.64	109.96	123.94	113.08	0	0	0	0
MTF2	9.41	11.35	6.45	6.89	0	0	0	0
MYT1L	0	0	0	0.57	0	0	0	0
NFIA	1.14	0	0	1.15	0	0	0	0
NFKBIA	586	761.92	1229.68	879.4	0	0	0	0
NFYB	18.54	24.2	21.39	21.81	0	0	0	0
Oasl	9.41	2.99	9.67	15.79	0	0	0	0
POU6F2	0.57	0.6	0	0.57	0	0	0	0
PRDX3	3.99	1.49	4.1	2.3	0	0	0	0
PSMD10	0	2.09	0.88	1.15	0	0	0	0
PYCARD	81.6	134.76	227.07	87.25	0	0	0	0
RELA	211.69	138.64	171.99	136.9	0	0	0	0
RFXANK	35.09	32.57	33.99	37.02	0	0	0	0
RIPK1	37.37	29.28	17.58	52.81	0	0	0	0
RNF31	15.69	20.62	9.96	17.22	0	0	0	0
RXRB	12.27	32.57	19.04	23.82	0	0	0	0
SP1	28.82	25.4	19.34	22.1	0	0	0	0
SP2	4.28	1.49	4.69	1.72	0	0	0	0
SPDEF	0	0.6	0	1.15	0	0	0	0
STAT1	99.28	97.4	85.26	78.93	0	0	0	0
STAT3	21.68	17.33	18.46	33	0	0	0	0
TAF11	9.99	18.23	12.01	19.52	0	0	0	0
TAF1B	3.14	6.27	8.2	3.44	0	0	0	0
TAF1C	6.56	14.34	12.31	4.59	0	0	0	0
TAF7	49.64	134.46	48.93	51.09	0	0	0	0
TCEA1	108.13	83.96	75.01	99.59	0	0	0	0
TCEA2	3.14	1.79	2.05	1.72	0	0	0	0
TCEAL1	14.55	14.34	19.92	16.65	0	0	0	0
TCEAL4	0.86	1.49	0	1.15	0	0	0	0
TCEB3	1.14	3.59	0	2.01	0	0	0	0
TCF12	21.97	21.51	25.2	27.84	0	0	0	0
TCF19	6.56	6.27	2.64	5.17	0	0	0	0
TCF4	0	1.2	0	0	0	0	0	0
TCF8	0.86	0.6	0.88	0.86	0	0	0	0
TFAM	3.42	2.39	0	2.58	0	0	0	0
TFAP4	3.42	3.29	3.22	1.44	0	0	0	0
TFB1M	7.99	8.96	7.03	6.89	0	0	0	0
TP53	0.57	1.79	0	0	0	0	0	0
TRAF5	16.55	4.78	8.79	10.33	0	0	0	0
TSSK4	0.57	0	1.46	0.86	0	0	0	0
UBE2N	19.4	13.15	15.83	33.58	0	0	0	0
UBE2V1	155.2	129.68	161.44	161.59	0	0	0	0
ZNF148	25.39	44.22	33.99	32.72	0	0	0	0
ZNF345	2.57	1.79	5.27	2.3	0	0	0	0
ARHGEF2	5.14	17.33	8.79	21.53	1	0	0	0
ATF2	0	0	0	0.57	1	2	0	2
ATF4	220.54	202.28	145.03	297.63	0	0	0	0
ATF6B	69.04	39.74	77.94	66.3	1	0	0	1
CARD15	12.27	6.57	6.74	11.77	6	1	8	3
CAT	6.85	38.84	25.2	16.07	0	1	1	2
CD3EAP	0.86	3.59	1.46	5.45	3	0	1	0
CNOT7	138.08	136.55	152.36	99.31	0	0	0	0
CREB1	2.28	0	0.88	0	2	0	0	1
CREBZF	132.09	88.44	70.61	95.29	5	4	12	4
LOC786432	3.42	4.18	2.05	1.72	2	0	0	2
CYLD	73.32	69.62	45.71	74.62	0	2	1	0
DAP	91.87	101.29	95.81	127.43	1	2	1	2
DEK	39.37	93.22	65.63	59.12	0	0	2	1
DNAJA3	26.82	31.37	27.83	22.96	2	0	0	0
E2F4	129.53	167.03	89.07	126	0	0	0	0
E2F6,ROCK2	8.56	11.05	10.84	17.51	7	9	12	5
EDF1	46.22	43.03	41.02	50.8	1	1	0	0
EPAS1	3.14	4.18	2.05	4.88	7	2	10	3
ERCC3	27.39	7.77	23.44	18.37	1	1	0	0
ERCC5	21.4	24.5	22.27	15.5	1	1	2	4
FAF1	26.53	20.32	24.61	20.09	0	0	1	0
FOXJ3	1.71	1.79	1.46	1.72	1	2	1	3
FOXP1	25.68	40.04	24.32	33.01	1	0	0	4
GABPB1	30.24	27.79	17.58	43.05	2	1	0	1
GTF2A2	33.09	50.2	43.07	58.84	0	0	1	2
GTF2B	23.39	22.71	37.21	29.28	4	1	2	3
GTF2E1	5.99	9.56	9.67	6.6	1	2	2	2
GTF2F2	4.85	5.68	4.1	7.18	3	4	6	3
GTF2H5	37.66	59.16	48.34	28.99	1	1	6	2
GTF2IRD2	0.57	1.49	0.88	0	3	3	5	2
GTF3C2	17.97	17.03	16.11	16.93	1	0	1	2
HBP1	0	0	0	0	1	1	1	0
HIF1A	242.5	80.97	104.01	187.13	2	0	0	1
IKBKB	0.57	0	0	0	1	3	3	1
JUN	352.63	611.63	549.36	574.88	0	0	0	0
MED26	50.21	29.58	22.56	58.55	1	0	0	0
MED31	10.84	14.04	20.22	9.47	3	5	3	4
MIZF	21.68	36.75	25.2	16.36	2	1	1	1
MNAT1	18.26	10.76	15.82	11.48	5	8	6	1
MTF1	25.11	8.96	19.92	11.19	0	0	0	1
MXI1	27.67	40.04	31.64	26.69	9	2	6	3
MYD88	43.37	82.17	65.34	45.92	4	2	2	4
NFKBIL2	18.83	17.63	20.22	11.48	1	0	1	0
NLRP3	23.68	7.17	42.78	12.05	9	8	4	10
NMI	44.22	45.71	58.31	23.82	2	1	1	0
NRG1	4.28	3.88	0.59	2.58	4	7	7	2
PBX3	2.57	3.88	4.98	3.16	0	0	2	0
PHTF1	7.42	4.78	4.39	7.18	0	0	2	0
PKNOX1	0	0	0	1.15	0	0	0	0
PPARD	6.85	9.26	5.86	34.73	3	0	1	2
PRDX3	51.92	85.16	103.43	46.78	1	1	2	1
RHEBL1	0.86	0	1.46	0	2	4	3	2
RPS3	2445.86	2760.24	1996.15	2554.69	2	0	4	4
SIVA1	14.84	23.01	15.24	17.22	2	0	0	1
SMAD4	30.82	17.33	17	37.6	0	0	0	0
SOX18	0	0	0	0	15	17	11	6
SOX5	5.99	3.59	8.5	10.62	0	2	3	2
SP7	0	0	0.59	0	9	7	2	4
SPIC	0	0	0.59	0	0	5	1	6
STAT5A	0.57	3.29	0	0.57	1	0	0	0
STAT6	1.43	0	0.59	0	2	0	0	2
SUFU	0.57	0	1.46	0	5	0	4	1
TACC3	3.71	15.54	4.69	9.47	0	0	0	1
TADA2L	3.99	6.27	5.57	3.44	0	2	2	3
TADA3L	153.49	73.5	138.58	59.7	0	0	0	1
TAF10	85.3	140.13	104.01	101.6	1	0	2	1
TAF12	9.41	8.07	14.94	10.62	0	0	0	0
TAF13	9.99	20.32	21.39	14.64	5	2	4	3
TAF9	45.65	32.57	49.52	36.45	0	0	0	0
TBP	9.7	12.85	7.32	16.36	0	2	2	0
TCEAL8	3.14	5.38	7.03	2.58	3	4	4	6
TCEB1	58.77	47.51	58.01	72.9	0	0	0	2
TCEB2	128.1	117.43	93.17	110.21	0	1	0	2
TCERG1	0.57	0	0.59	0	1	1	1	2
TCF25	87.87	35.56	72.37	91.27	2	0	0	1
TERF2IP	4.28	10.46	5.86	4.02	1	1	0	1
TFB2M	15.98	20.92	14.06	17.22	0	0	2	2
TFCP2	31.1	25.99	46.59	18.94	0	0	1	2
TFDP1	21.68	25.4	21.97	27.55	0	0	0	2
TFE3	1.43	4.18	0	3.73	1	1	2	4
TFEC	5.14	11.65	8.2	4.59	10	4	14	3
tlr3	6.56	10.16	5.57	3.44	3	6	1	4
UBE2I	62.2	42.13	70.02	56.25	0	0	0	2
ZNHIT3	28.24	38.54	31.35	43.05	4	1	0	2
